# Supplementary material for: MDM4 Isoform Expression in Melanoma Supports an Oncogenic Role for MDM4-A
Source: Hindawi journal article supplement (doi:10.1155/2021/3087579), 2021-10-16
Supplement: f1 [file 3087579.f1.zip]

### **Description of Supplemental Files**

**Supplemental Table 1.** Clinical diagnostic details of specimens used for RT-PCR analysis.

**Supplemental Table 2.** PCR primers.
