# Supplementary material for: MDM4 Isoform Expression in Melanoma Supports an Oncogenic Role for MDM4-A
Source: Hindawi journal article supplement (doi:10.1155/2021/3087579), 2021-10-16
Supplement: f1 [file 3087579.f1.zip]

| <b>Amplicon</b> | <b>Forward Primer (5'-3')</b>   | <b>Reverse Primer (5'-3')</b>   |
|-----------------|---------------------------------|---------------------------------|
| MDM4-FL         | <i>AGATGCTGCTCAGACTCTCG</i>     | <i>TCAGGATGTGGGTACTGCCA</i>     |
| MDM4-211        | <i>CTCCTGGACAAATCAATCAGGAAA</i> | <i>TGATCCCTGCAACTCAGTGG</i>     |
| MDM4-XAlt1      | <i>CAGGTGCGCAAGGTGAAATG</i>     | <i>ACTACAGGTGATTGAAGTGGGA</i>   |
| MDM4-XAlt2      | <i>ACTGTAAAGAGGTGATTGAAGTGG</i> | <i>TGATCCCTGCAACTCAGTGG</i>     |
| MDM4-A          | <i>CACACTGCCTACCTCAGAGC</i>     | <i>GACAAATCAGGTGATTGAAGTGGG</i> |
| MDM4-G          | <i>CCTGGACAAATCAATCAGGATCAC</i> | <i>TATCCCCACACTGCCTACCT</i>     |
| MDM4-S          | <i>CAGCAGGTGCGCAAGGTGAA</i>     | <i>CACTGCTACTACAGCAAAGTG</i>    |
| B-Actin         | <i>TTCCTATGTGGGCGACGAG</i>      | <i>CGTGTGGCTCCCGAGGA</i>        |
