# Supplementary material for: MDM4 Isoform Expression in Melanoma Supports an Oncogenic Role for MDM4-A
Source: Hindawi journal article supplement (doi:10.1155/2021/3087579), 2021-10-16
Supplement: f1 [file 3087579.f1.zip]

| Cases   | Patient Age | Patient Sex | Biopsy Site                   | Diagnosis                                                          | Breslow Thickness (mm) | Assoc or Nevus (Y or N) | Castle Class |
|---------|-------------|-------------|-------------------------------|--------------------------------------------------------------------|------------------------|-------------------------|--------------|
| Case 1  | 49          | M           | Right Upper Back PS           | melanoma                                                           | 0.5                    | Y                       | 1A           |
| Case 2  | 55          | M           | Right Back                    | melanoma                                                           | 1.5                    | N                       | 1B           |
| Case 3  | 67          | M           | Left Ear                      | melanoma                                                           | 1.6                    | N                       | 1A           |
| Case 4  | 50          | M           | Left Medial Calf              | melanoma                                                           | 2.5                    | N                       | 2B           |
| Case 5  | 53          | M           | Right Superior Upper Back     | melanoma                                                           | 0.4                    | N                       | 1A           |
| Case 6  | 33          | F           | Left Posterior Shoulder       | melanoma                                                           | 0.4                    | Y                       | 1A           |
| Case 7  | 53          | M           | Right Inner Thigh             | melanoma                                                           | 0.8                    | N                       | 1B           |
| Case 8  | 68          | M           | Nose                          | melanoma                                                           | 0.5                    | N                       | 2A           |
| Case 9  | 64          | M           | Right Calf                    | melanoma                                                           | 0.6                    | N                       | 1B           |
| Case 10 | 74          | M           | Left Forearm Proximal         | melanoma                                                           | 2.1                    | N                       | 2B           |
| Case 11 | 70          | M           | Left Upper Arm                | melanoma                                                           | 0.3                    | N                       | 1A           |
| Case 12 | 71          | M           | Right Posterior Sholuder      | melanoma                                                           | 0.3                    | N                       | 1A           |
| Case 13 | 71          | M           | Left Forearm Proximal         | melanoma                                                           | 1.5                    | N                       | 2B           |
| Case 14 | 29          | F           | Right Upper Helix             | melanoma                                                           | 0.5                    | N                       | 1A           |
| Case 15 | 39          | M           | Right Anterior Deltoid        | melanoma                                                           | 1.1                    | Y                       | 1A           |
| Case 16 | 58          | F           | Left upper arm                | melanoma                                                           | 0.9                    | N                       | 1A           |
| Case 17 | 63          | F           | Left Upper Arm                | melanoma                                                           | 0.9                    | Y                       | 1A           |
| Case 18 | 83          | M           | Scalp                         | melanoma                                                           | 1.7                    | N                       | 2A           |
| Case 19 | 73          | M           | Vertex                        | melanoma                                                           | 0.5                    | N                       | 1A           |
| Case 20 | 67          | M           | Right Arm                     | melanoma                                                           | 0.4                    | Y                       | 1A           |
| Case 21 | 43          | F           | Right Abdomen                 | melanoma                                                           | 0.4                    | Y                       | 1A           |
| Case 22 | 61          | F           | Right thigh                   | melanoma                                                           | 0.9                    | Y                       | 1A           |
| Case 23 | 68          | F           | Left anterior proximal thigh  | melanoma                                                           | 0.7                    | N                       | 1A           |
| Case 24 | 73          | F           | Right upper posterior arm     | melanoma                                                           | 2.5                    | N                       | 2B           |
| Case 25 | 71          | F           | Left posterier shoulder       | melanoma                                                           | 0.4                    | N                       | 1A           |
| Case 26 | 79          | M           | Right Posterior Sholuder      | melanoma                                                           | 1.2                    | N                       | 2A           |
| Case 27 | 57          | F           | Left posterior deltoid        | melanoma                                                           | 0.5                    | N                       | 1A           |
| Case 28 | 47          | F           | Top scalp                     | melanoma                                                           | 4.1                    | N                       | 2B           |
| Case 29 | 70          | M           | Right lower leg               | melanoma                                                           | 0.8                    | N                       | 1A           |
| Case 30 | 77          | M           | Back of neck                  | melanoma                                                           | 5                      | N                       | 2B           |
| Case 31 | 14          | F           | Right T4                      | Compound melanocytic nevus                                         |                        |                         |              |
| Case 32 | 32          | F           | Left temple                   | Compound melanocytic nevus                                         |                        |                         |              |
| Case 33 | 34          | F           | Right antecubital             | Compound melanocytic nevus                                         |                        |                         |              |
| Case 34 | 60          | F           | Left mid. Lat. Low. Extremity | Spindle cell nevus of reed, inflamed and irritated                 |                        |                         |              |
| Case 35 | 2           | M           | Might medial forearm          | Pigmented spindle and epitehlioid cell melanocytic nevus, inflamed |                        |                         |              |
| Case 36 | 49          | F           | Left medial thigh             | Intradermal melanocytic nevus                                      |                        |                         |              |
| Case 37 | 41          | F           | Right mid. Inframammary fold  | Intradermal melanocytic nevus                                      |                        |                         |              |
| Case 38 | 54          | F           | right alar crease             | Intradermal melanocytic nevus                                      |                        |                         |              |
| Case 39 | 15          | F           | right dorsal forearm          | Spitz's Nevus, inflamed                                            |                        |                         |              |
| Case 40 | 25          | F           | Right posterior thigh         | Spitz's Nevus                                                      |                        |                         |              |
